# Supplementary material for: Characterization of the zinc metalloprotease of Streptococcus suis serotype 2
Source: Springer Nature journal article supplement (doi:10.1186/s13567-018-0606-y), 2018-10-29
Supplement: 13567_2018_606_MOESM3_ESM.pdf [file 13567_2018_606_MOESM3_ESM.pdf]

Zmp 1 MKR-SLGEKRQRFGRKMSVGLVSAAVTSLFFVSSVATAPTAS--AQSINYSYVTEQELT  
ZmpC 1 MSRKSLGEKRHSFSMRKLSVGLVSVTVSSFFLMSQGIQSVSADNMESPIHYKYMTEGKLT

Zmp 58 DGEKELIIRDLPLGLAQETD VNYLLIYRPATGTTSTPSTSTSQVLPNTGSVET--ELIVAG  
ZmpC 61 DEKSLLVLEALPQLAEESDDTYLLVYRS-----QQFLPNTGFNPTVGTFLIFTA

Zmp 116 GVSLLLLAVRFGKKGKKELAGVILLTATGASFFGPTSSALTSQILARYNHATEISAGQAL  
ZmpC 109 GLSLLVLLVSKRENGKKRLVHFTLLTSMGVQLLPASAFGLTSQILSAYNSQLSIGVGEHL

Zmp 176 PAPAELIDGYVYVGYLKDSKAIEQTTSEEKTAEFPASEGIRIETIVNKTEAIPFEIQTVE  
ZmpC 169 PEPLKIEGYQYIGYIKTKK---QDNTELSRTVVGKYSAQRDSQPNSTKTSDVVH----SA

Zmp 236 NPQLSAGTERVVGEGQ-DGERIVTIKQVHSGQIISEEEISSVTKTAVPKIVEVGTKQA  
ZmpC 222 DLEWNQGGQKVSLOGEASGDDGLSEKSSIAADNLSSNDSFASQVEQ-----NPDHK

Zmp 295 TDDIVTEVPDTEPSYENSTNSLITEETVHTTEVFVAF-DVQEIYDVNL-AEGSREVEQKGGQD  
ZmpC 273 GESV---VRPTVPEQGNPVSATIVQSA-EEVLAITNDRPEYKLPLETGKGTQEPGHEGEA

Zmp 353 GVRT---IETRNYYADGVLIKSEQVSDVV-TKEPVTEVVRVVGTKTIDVIGSETIVTTEEL  
ZmpC 329 AVREDLPLVYTKPLETKGTQGPGEHEGAAVRE-EEPAYTEPLATKGTQE-----

Zmp 409 PFETTVTETEELYVGEEKFITEGKVGSKEVTTTYQT---INGVSQPNPTVTEKVLLEPPT  
ZmpC 376 -----PGHEGKATVREETLEYTEPVATKGTQEPHEGEEAAVEELPA

Zmp 466 KEVLKGTKPIEGTEIEFTNQVEITTEPEYVDDPTLLEGKTKVVTAGVNGSKTVTTTTYQTIK  
ZmpC 418 LEVTT-----RNRTEIQNIPYTTEEIQDPTLLKNRRKIERQAGRTIQYEDYIVN

Zmp 526 GVRQENSTVTEETTKQPVKQV IARGTKVEKVPQVITITDLVENDDAKSATISYKLTDETAN  
ZmpC 470 GNVVETKEVSR-TEVAPVNEVVKVGTLLVKVKPTVEITNLTKVENKKSITVSYNLIDTISA

Zmp 586 FQRAVALYDNTGALVQEQTHDTPNGQLTLENLDFYTDYTVKTKIFYTMAEQEQSSEQEA  
ZmpC 529 YVSAKTQVEHG-DKLVKEVDIENPAKEQVISGLDYTPYTVKTHLTYNLGENNEEN----

Zmp 646 ILESMRKFDLVYKKIEIKDIDAVTVYRRKNGSYIGQEFLEELPASTDELFIKVTSDRFKE  
ZmpC 584 TETS TQDFQLEYKKIEIKDIDSVELYGKENDRYRRYLSLSEAPTDTAKYFVKVKSDFRKE

Zmp 706 VYLPVSSIEETTLNGKAVFKLVSSFDELVQDKDAQYVANREFYIPKM-ATDANTYTSFKA  
ZmpC 644 MYLPVKSITENT---DGTYKVTVAVDQLVEEGTDGYKDDYTFTVAKSKAEQPGVYTSFKQ

Zmp 765 LLDAMKANPSGTEKLGALDASEVPVGDV-ASYVTN-FSGTLDGLNDGYAFSISNLKAPL  
ZmpC 701 LVTAMQSNLSGVYTLASDMTADSVSLGDKQTSYLTGAF TGSLLIGSDGTSYAIYDLKKPL

Zmp 823 FFNLGC-KVONLDIKNASLNTSSKNPLATIAINANGATITNVAVEASTKGPQNVSGLVHS  
ZmpC 761 EDTLNGATVRLDLDIKTVSA--DSKENVAALAKAANSANINNVAVEGKISGAKSVAGLVA

Zmp 882 ATNTITKGVSEFKGSEV--TGITNASLTGGILGNG--TMASVGNKVDATITLTP-GTENQV  
ZmpC 819 ATNTVLENSSETGKLIANHQDSNKNDTGGIVGNITGNSSRVNVKVRVDALISTNARNNNQT

Zmp 937 AGGIVGRITMLVYDVPCSVYNSYAAGSIVTTESAAIVGGIAGANQVTGAYAPHSGNVNNVV  
ZmpC 879 AGGIVGRLE----NGALISNSVATGEIRNGQGYSRVGGIVGSTW-----QNGRVNNVV

Zmp 997 SDM-TGTKSIIIGQPANPTKIKDGFITTSDSLTT--NVTVITDEEAQAKVEAMAIQATIDD  
 ZmpC 928 SNVDVGDGYVITGDQYAAADVKNASTSVDNRKADRFATKLSKDQIDAKVADYGITVITLDD

Zmp 1054 S-VPIPNPHYSVDYLTLDKAQADHETAYYNMEKILPFYKELLYVYGNKIATDDKLNKVR  
 ZmpC 988 TGQDLKRNLRVDYTRLNKAEAEKVAYSNIEKLMFPYKDLVVHYGNKVATTDKLYTTE

Zmp 1113 LLDVVPMKDNAVADVYA EKANINKIMLHYADGTVDYKTVSYLEDFKNNHVVEYTIISGTD  
 ZmpC 1048 LLDVVPMKDDEVVTDLNNKNSINKVMLHFKNNTVEYLDVTFKENFINSQVIEYNVTGKE

Zmp 1173 LIYTPESFLINDRSALVNDLVSSLSSVVLDSAMKAVINYPTTLNADTQTGTAKDFYFGES  
 ZmpC 1108 YIFTPFAFVSDYTAITNNVLSLDLQNVTLNSEATKVLGAAN-----DAALDNLVLDLDRQ

Zmp 1233 YDQVMTNLESNVRKLLV--ASLNGOQOASEDYIKEKIINNKAAFVLGLTYLNRWYDINFG  
 ZmpC 1161 FEEVKANLAELRKLAMDKSINTTCDGVVEYVSEKIKNNKEAFMLGLTYMNRWYDINYG

Zmp 1291 EMNTKDLTIEPDDFFGNDAASALDMILAI GNGGYDVLRAHNNVTFASII GKQNNQTKLF  
 ZmpC 1221 KMNTKDLSTYKFDNFNGNETSILDTIVALGNSGLDNLRASNTVGLYANKLASVKGEDSVF

Zmp 1351 DMLEDYRQLFLPEMTNNEWFKQTTKAYVVEGKSLIPEVAAKQETTTDYSKYNVGAYSKIV  
 ZmpC 1281 DFVEAYRKLFLFNKTNNEWFKENTKAYIVEMKSDIAEVREKQESPTADRKYSLGVY----

Zmp 1411 NDTVSNPTWKYNHMLLPLLTLPQENIFIIITNMNTIAIGSYEHYVDDYSTV-----ENRDK  
 ZmpC 1337 -DRISAPSWGHSMLLPLLTLPESVYISNMSTLAFGSYERYRDSVDGVILSGDALRTY

Zmp 1466 VRQVMDIAAERQRDNADFWYKILDETNRDKLFRSVLNNEGYVMYGKDGTKSYRNLIT-ADV  
 ZmpC 1396 VRNRVDIAAKRHRDHYDIWYNLDSASKEKLFRSVIVYDGFNVKDETGRTYWARLITDKNI

Zmp 1525 DAIQDFYGPINKWYREHPSIKTAFADGSETYYITYDMLTDYGTALYTHEMVHNOGDYIYL  
 ZmpC 1456 GSIKEFFGPGVCKWY-EYNSSAGAYANGSLTHFVLDRLLDAYGTSVYTHEMVHNSDSAIYF

Zmp 1585 KGYGRRIGQMEVYAQGLLQNVFNVTENMLGFAVAVYNS--DDANRVHVGDPVARFNSEAD  
 ZmpC 1515 EGNRRREGLGAEIYALGLLQSVDSVNSHILALNTLYKA EKDDLNRLLHTYNPVERFDSDEA

Zmp 1643 FNEYFHNQFDVLYL LDYLEGNTNILAQSDANKKAWLRKIENYYVQNN--GVDTHAGNSARA  
 ZmpC 1575 LQSYMHGSDVVMYTL DAMEAKAILAQNNDVKKKWF RKIENYYVRDTRHNKDTHAGNKVRP

Zmp 1701 LTDAEVASLKSFNLDLIDQSIIVQRQYVNNPNTNTSKKWDNRNSYVSVPMFAANFSALSNSNG  
 ZmpC 1635 LTDEEVANLTSLNSLIDNDIINRRSY-----DDSREYKRNGYTTISMFSPVYAALSNSKG

Zmp 1761 SPGDIMFRMAFELIAAKGYTDGFVPYASGQLSDLAMEKGSIIYDTWNKKNNTGLITDDHV  
 ZmpC 1690 APGDIMFRKIAEYELIAEKGYHKGFLPYVSNQYGAEEAFASGSKTFSSWHGRDVALVTDDL

Zmp 1821 LEYVFOGQYTSWAEFKKAMFTERLEKAATGQLKPFMTOYELGVADSTKEVTITTSFEQLQN  
 ZmpC 1750 FKKVFNGEYSSWAEFKKAMFKORIDKQ--DNLKPIITIQYELGNPNSTKEVTITTTAAQMQQ

Zmp 1881 LMKAEAMEADIQAN---SLNLNNSRVHALKVKVYQALMNSTNDFRTSIFN  
 ZmpC 1808 LLNEAAAKDITNIDRAISHTPASWVHLKQKIYNAYLRITDDFRNSIYK
